# Supplementary material
Source: Springer Nature journal article supplement (https://www.springermedizin.de/resource/supplementary/12913_2011_1952_MOESM2_ESM.pdf/9530592)

## Intimate Partner Violence Intervention Clinical Pathway

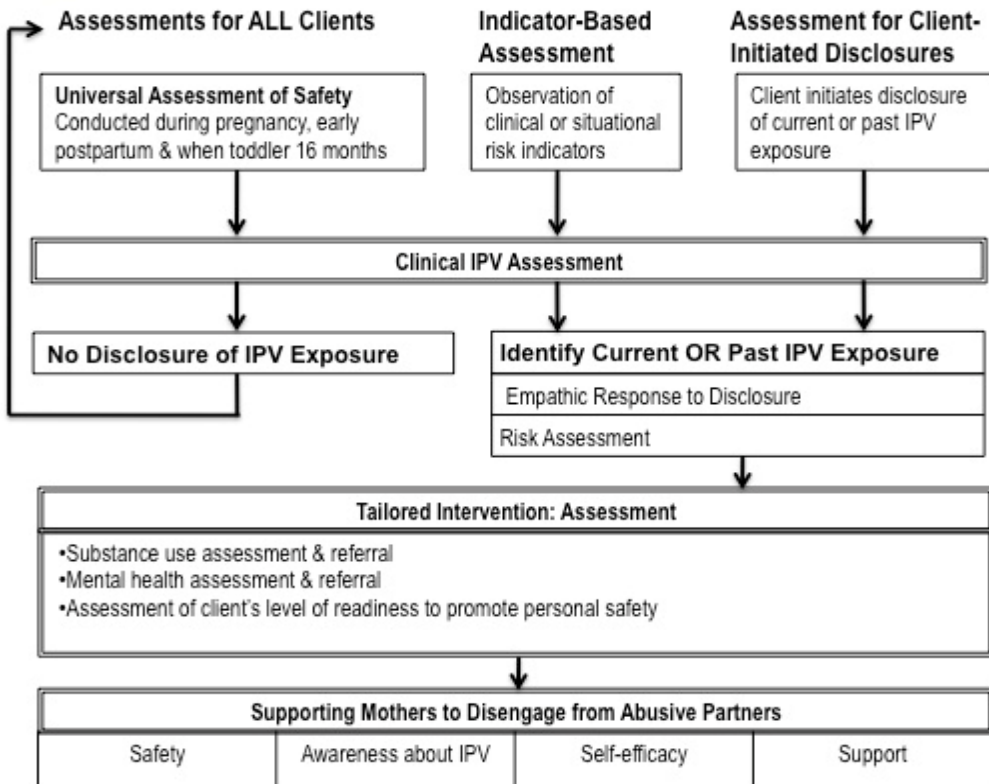

Supplement: MOESM2 [file 9530592]
